# Supplementary material
Source: MDPI journal article supplement (https://www.mdpi.com/2624-781X/4/1/8)
Supplement: s1 [file s1]

# Supplementary Materials

to the article

## **A simple way to decachloro cobalt bis(dicarbollide)**

by

Sergey A. Anufriev, Marina Yu. Stogniy\* and Igor B. Sivaev

A.N. Nesmeyanov Institute of Organoelement Compounds, Russian Academy of Sciences, 28 Vavilov Str., 119991, Moscow, Russia

\*stogniy@ineos.ac.ru

The NMR spectra at 400.1 MHz ( $^1\text{H}$ ), 128.4 MHz ( $^{11}\text{B}$ ) and 100.0 MHz ( $^{13}\text{C}$ ) were recorded with Varian Inova-400 and Bruker-400 spectrometers. All spectra were processed in MestRenova version 6.0.2-5475. When processing  $^{11}\text{B}$  NMR and  $^{11}\text{B}$  NMR  $\{^1\text{H}\}$  spectra, the baseline alignment was applied to improve the quality of integration.

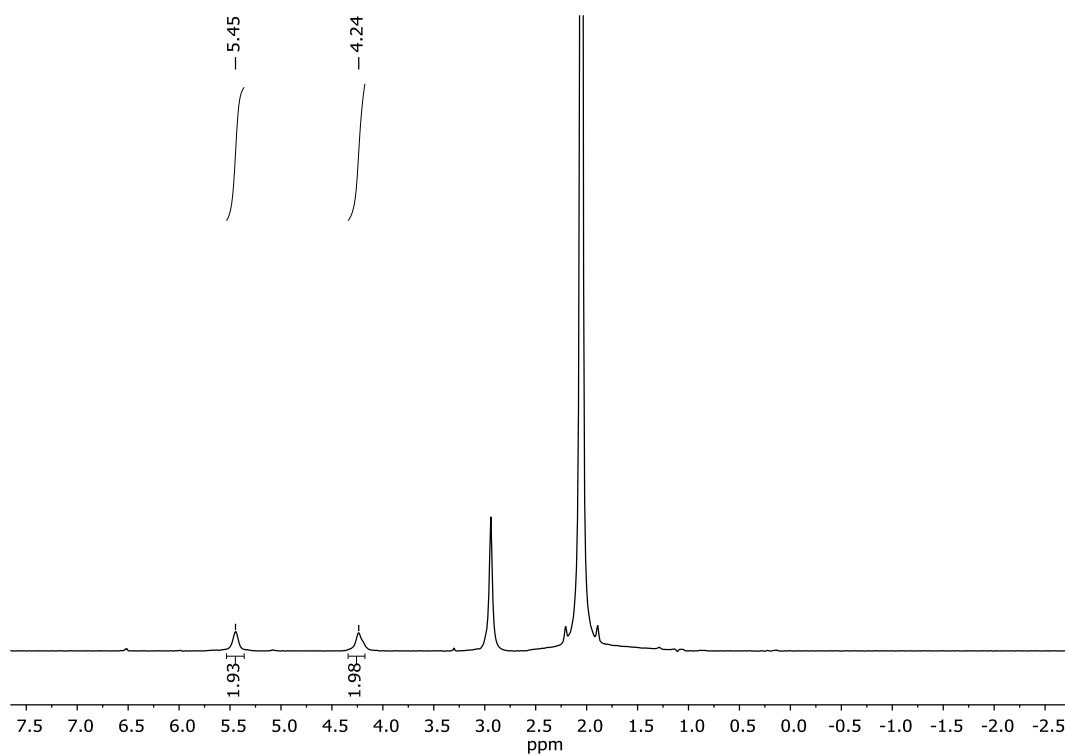

**Figure S1.**  $^1\text{H}$  NMR spectrum of  $\text{Cs}[3,3'\text{-Co}(4,7,8,9,12\text{-Cl}_5\text{-1,2-C}_2\text{B}_9\text{H}_6)_2]$  in acetone- $\text{d}_6$

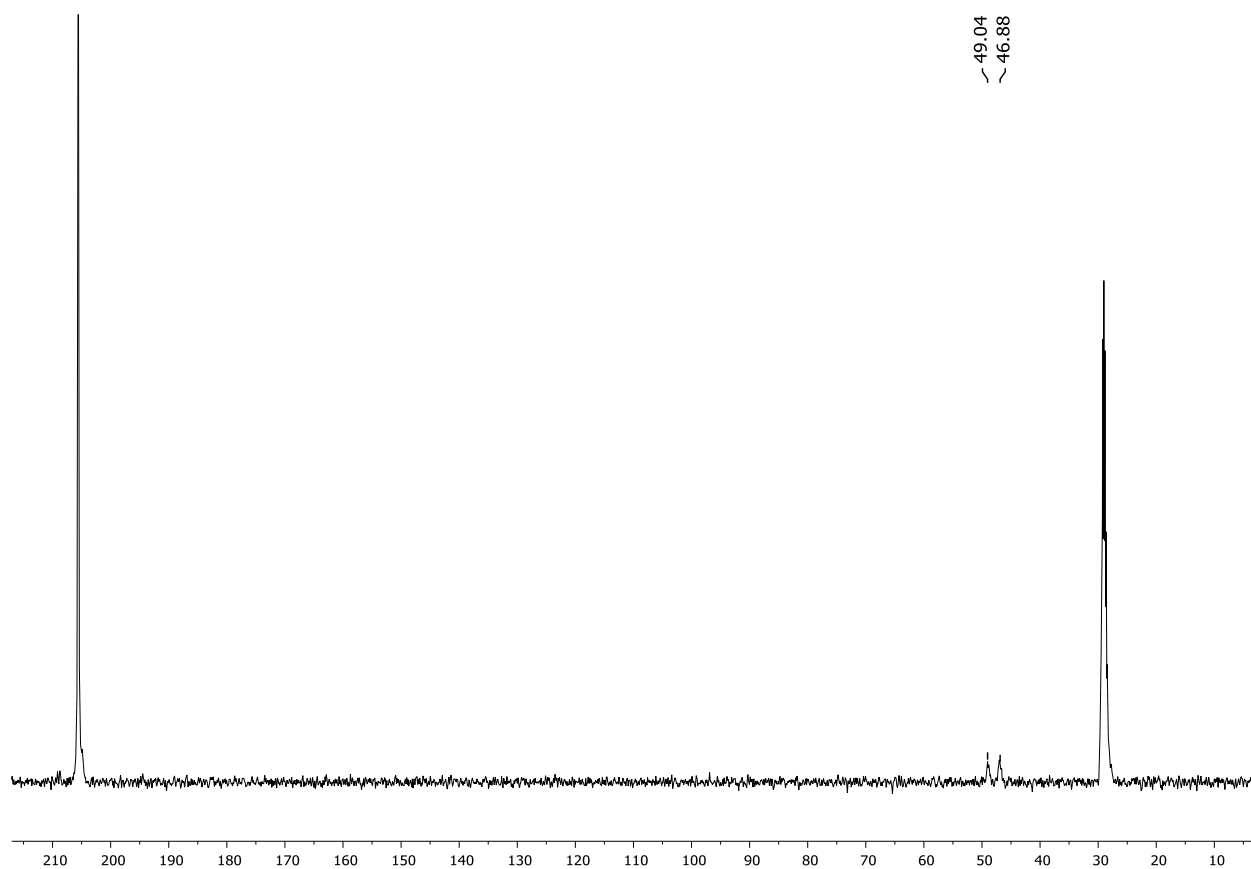

**Figure S2.**  $^{13}\text{C}$  NMR spectrum of  $\text{Cs}[3,3'\text{-Co}(4,7,8,9,12\text{-Cl}_5\text{-1,2-C}_2\text{B}_9\text{H}_6)_2]$  in acetone- $\text{d}_6$

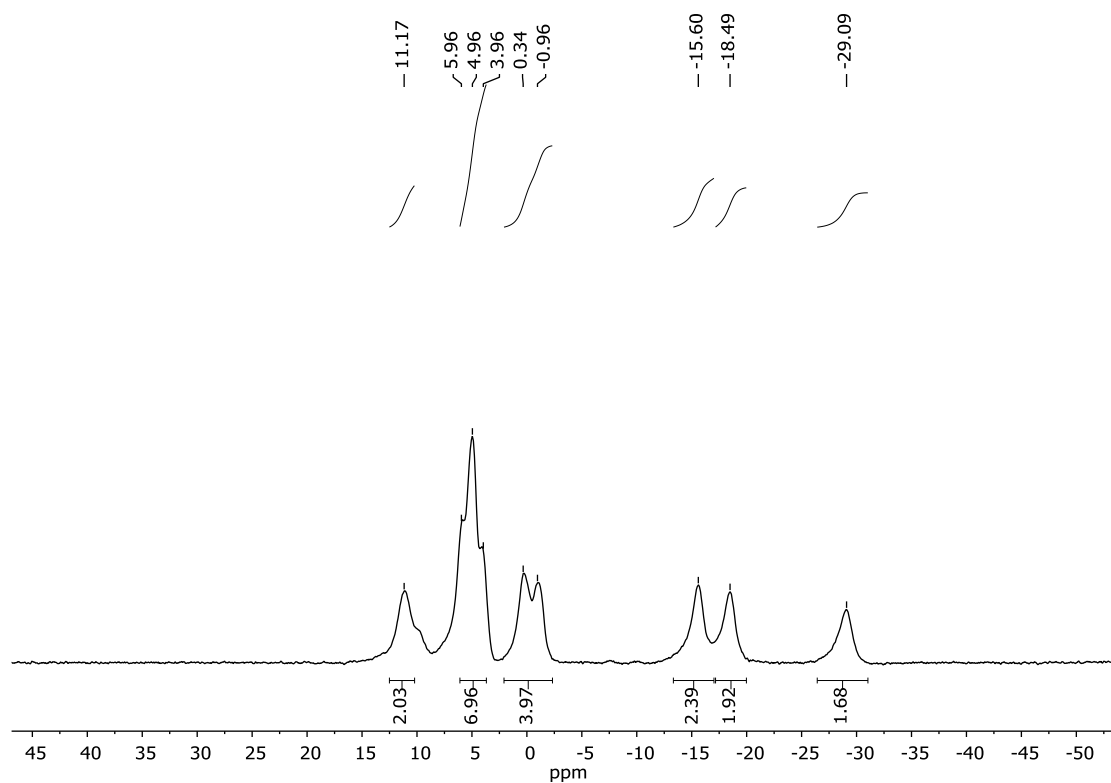

**Figure S3.**  $^{11}\text{B}\{^1\text{H}\}$  NMR spectrum of  $\text{Cs}[3,3'\text{-Co}(4,7,8,9,12\text{-Cl}_5\text{-1,2-C}_2\text{B}_9\text{H}_6)_2]$  in acetone- $\text{d}_6$

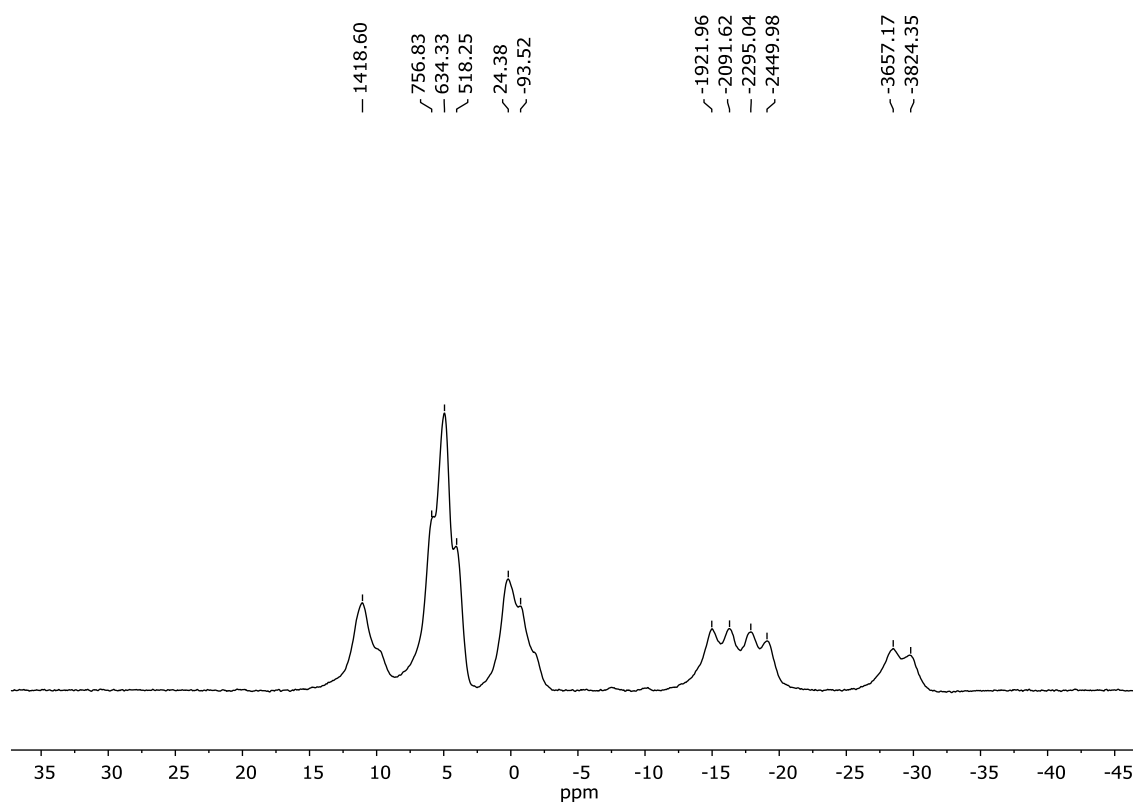

**Figure S4.**  $^{11}\text{B}$  NMR spectrum of  $\text{Cs}[3,3'\text{-Co}(4,7,8,9,12\text{-Cl}_5\text{-1,2-C}_2\text{B}_9\text{H}_6)_2]$  in acetone- $\text{d}_6$

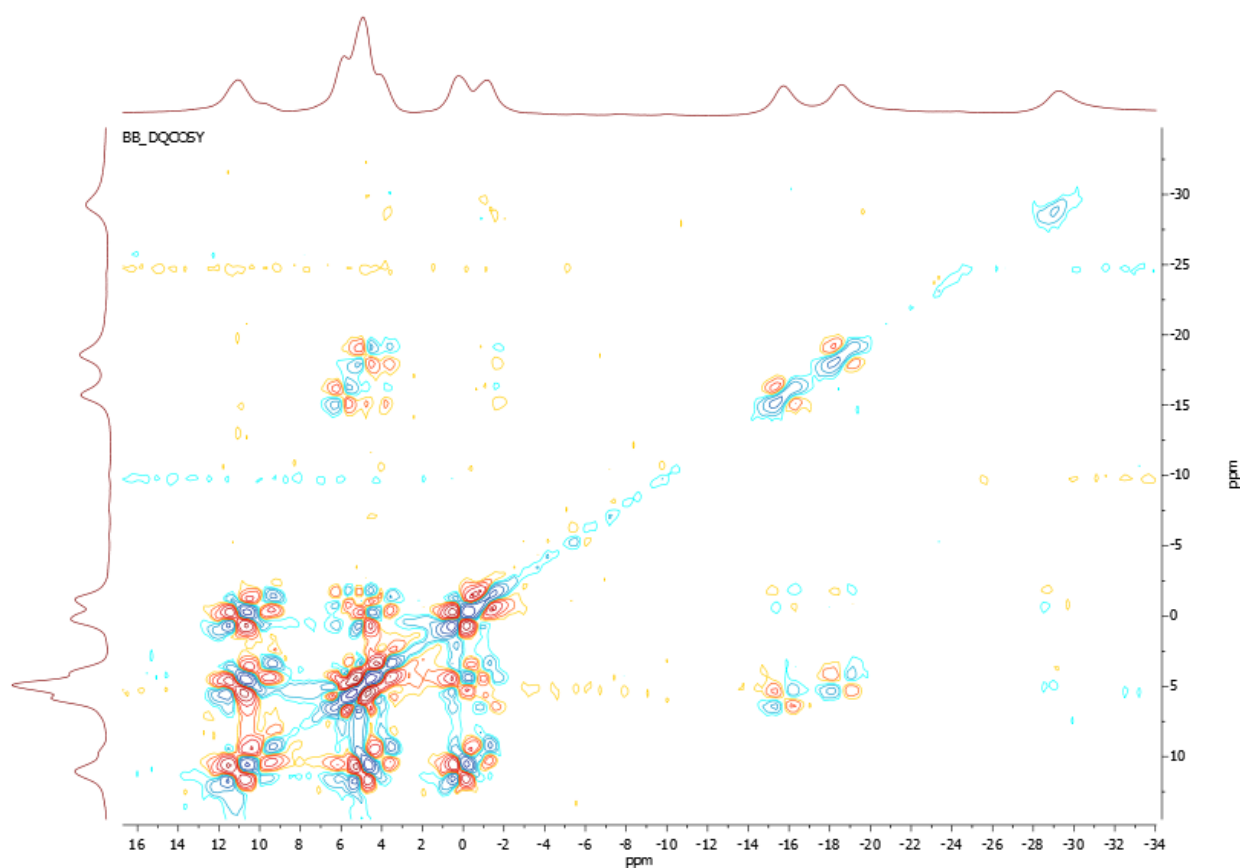

**Figure S5.**  $^{11}\text{B}$ - $^{11}\text{B}$  COSY NMR spectrum of  $\text{Cs}[3,3'\text{-Co}(4,7,8,9,12\text{-Cl}_5\text{-1,2-C}_2\text{B}_9\text{H}_6)_2]$  in acetone- $\text{d}_6$

d10

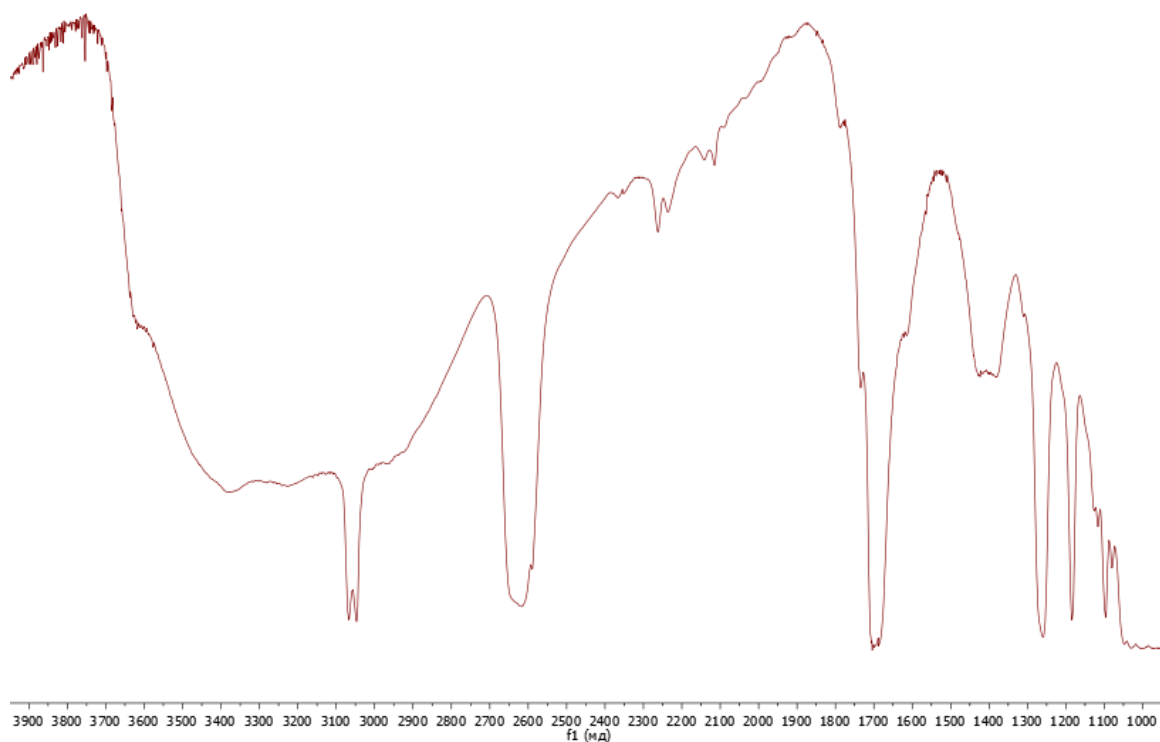

**Figure S6.** IR spectrum of  $\text{Cs}[3,3'\text{-Co}(4,7,8,9,12\text{-Cl}_5\text{-1,2-C}_2\text{B}_9\text{H}_6)_2]$  (thin film from acetone)

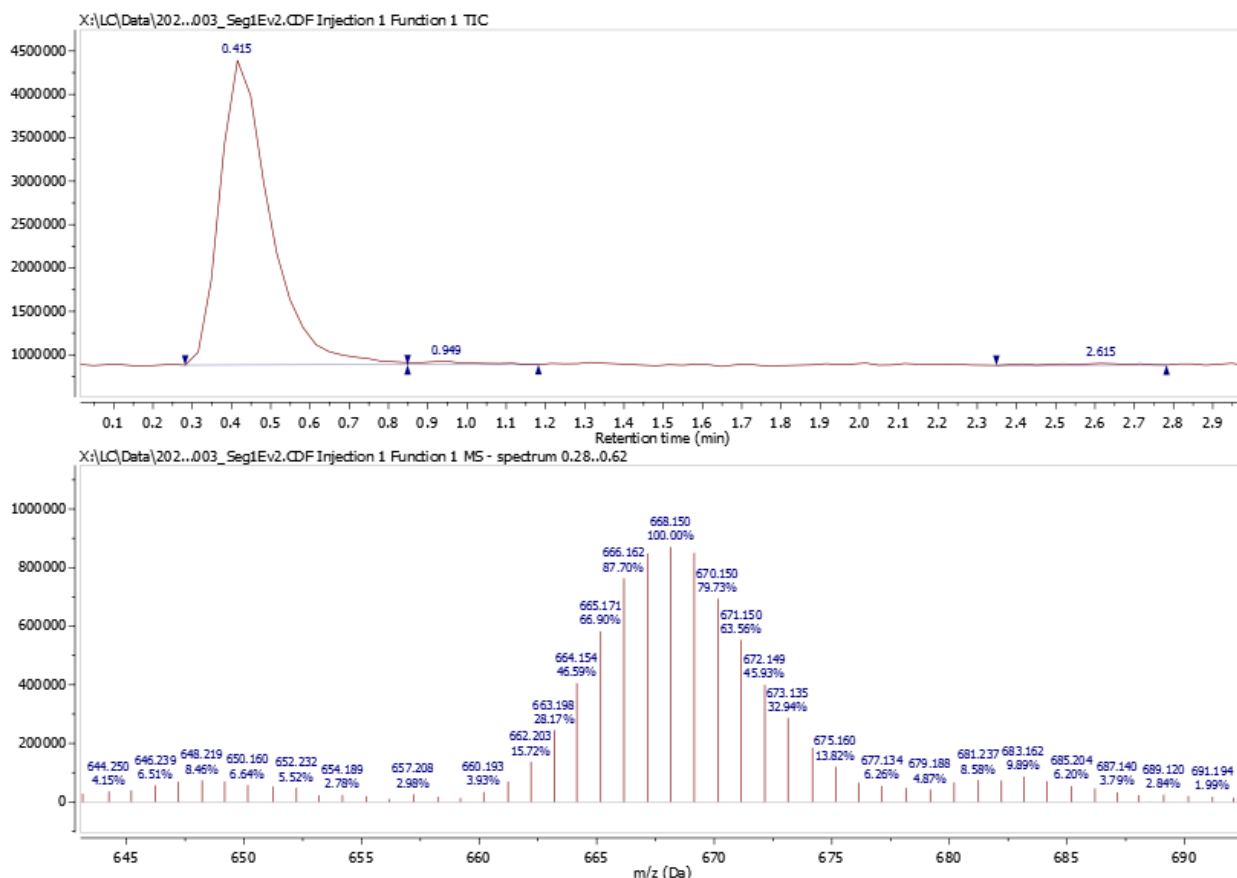

**Figure S7.** Mass-spectrum of Cs[3,3'-Co(4,7,8,9,12-Cl<sub>5</sub>-1,2-C<sub>2</sub>B<sub>9</sub>H<sub>6</sub>)<sub>2</sub>]

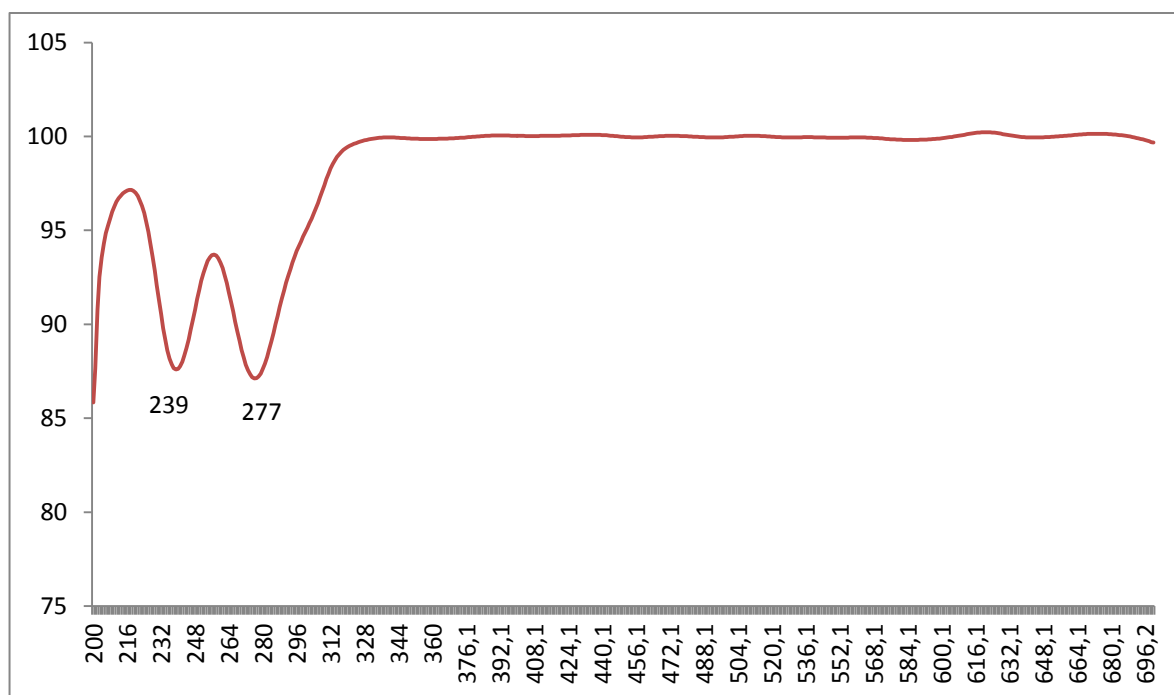

**Figure S8.** UV/Vis spectrum of Cs[3,3'-Co(4,7,8,9,12-Cl<sub>5</sub>-1,2-C<sub>2</sub>B<sub>9</sub>H<sub>6</sub>)<sub>2</sub>]
